# Supplementary material for: Dihydropyrimidine Dehydrogenase Phenotyping Using Pretreatment Uracil: A Note of Caution Based on a Large Prospective Clinical Study
Source: PubMed Central journal article supplement — Clin Pharmacol Ther. 2022 May 4;112(1):62–8. doi: 10.1002/cpt.2608 (PMC9322339; doi:10.1002/cpt.2608), 2022-05-04
Supplement: CPT-112-62-s005.pdf [file CPT-112-62-s005.pdf]

### Supplementary Figure S1: Flowchart of patient inclusion

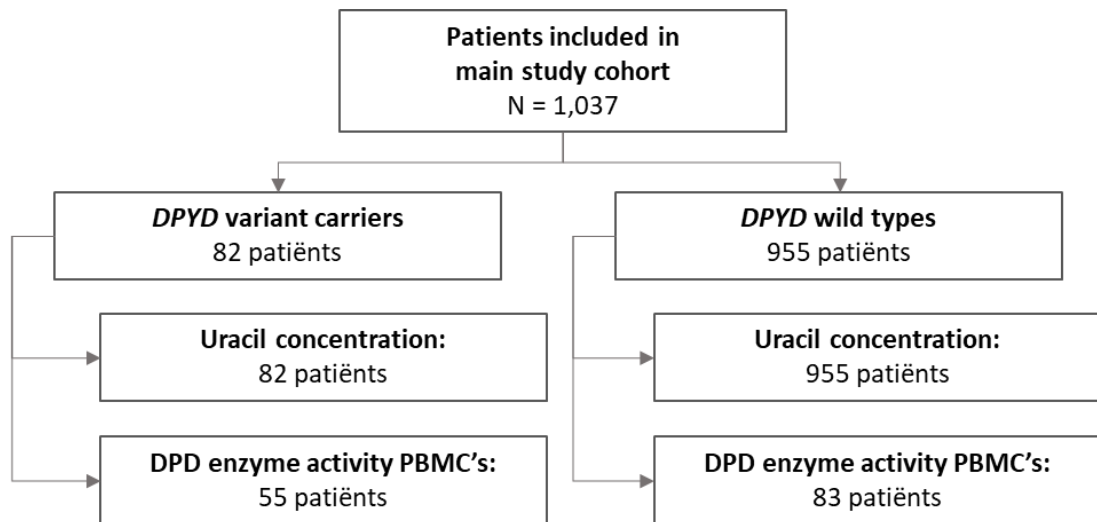

Flowchart of patient inclusion and the number of *DPYD* variant and *DPYD* wild type patients of whom is measured the pretreatment uracil concentration and the DPD enzyme activity in PBMC's. **Abbreviations:** DPD = dihydropyrimidine dehydrogenase; PBMC's = peripheral blood mononuclear cells.
